# Supplementary material for: Highly stable and efficient perovskite solar cells passivated by a functional amorphous layer
Source: Royal Society of Chemistry journal article supplement (doi:10.1039/d1ta07505e), 2021-01-01
Supplement: d1ta07505e1.pdf [file d1ta07505e1.pdf]

## Supporting information

### **Highly stable and efficient perovskite solar cells passivated by a functional amorphous layer**

*Guanqi Tang, Tianyue Wang, Jiupeng Cao, Zeyu Zhao, Jiajun Song, Pei Liu, Haiyang Cheng, Fangyuan Zheng, Jiong Zhao and Feng Yan \**

Dr. G. Q. Tang, Dr. T. Y. Wang, Dr. J. P. Cao, Z. Y. Zhao, J. J. Song, Dr. P. Liu, H. Y. Cheng, F. Y. Zheng, Dr. J. Zhao and Prof. F. Yan\*

Department of Applied Physics, The Hong Kong Polytechnic University, Hung Hom, Kowloon, Hong Kong.

E-mail: apafyan@polyu.edu.hk

## Experimental Section

**Preparation of PSCs:** ITO/glass substrates were sequentially washed with distilled water, acetone and isopropanol (IPA). Then, PTAA (Sigma) dissolved in toluene (2.0 mg/mL) was spin-coated on the ITO/glass substrates at a spin rate of 3000 rpm for 40 s. The films were subsequently annealed on a hotplate at 100 °C for 10 min. The perovskite films were prepared by spin-coating the perovskite precursor solution containing CH<sub>3</sub>NH<sub>3</sub>I (Dyesol): 159 mg, PbI<sub>2</sub> (Alfa, 99.99%): 484 mg, DMF (Sigma, anhydrous, 99.9%): 720 µL, DMSO (Sigma, anhydrous, 99.9%): 78 µL, at 4000 rpm for 30 s. During the spin coating process, 0.5 ml of diethyl ether (Sigma, anhydrous, 99.7%) was slowly dripped on the rotating substrate in 10 secs after starting. For 5-SSA doped films, different amount of 5-SSA were added into the perovskite precursor solution. All perovskite films were annealed at 100 °C for 15 min. Next, electron transport layers (ETLs) were prepared by spin coating a solution of PCBM (Nano-C) in chlorobenzene (20 mg/ml) at 3000 rpm for 30 s. Bathocuproine (BCP, Sigma, 96%) dissolved in IPA (0.5 mg/ml) was spin-coated on the PCBM films at 4500 rpm for 30 s. Finally, devices were completed with the evaporation of silver (Ag) top electrodes through a shadow mask. The area of the PSC is designed to be 6 mm<sup>2</sup>.

**Material and device characterization:** Scanning electron microscopy (SEM) images of perovskite thin films were obtained under a Hitachi S-4300 microscope. The TEM images of perovskite films were conducted using JEOL JEM-2100F TEM/STEM operated at 200 kV, using Gatan Enfina electron spectrometer (CA, USA). X-ray diffraction (XRD) measurement was performed using a Rigaku SmartLab X-ray

Diffractionmeter operating at room temperature. Time-resolved photoluminescence (PL) measurements of the samples were carried out by using an Edinburgh FLSP920 fluorescence spectrophotometer. A 632-nm laser was used as an excitation light source.

The current density versus voltage (J-V) characteristics of the PSCs were measured by using a Keithley 2400 source meter under the illumination of an AM 1.5 solar simulator with a light intensity of 100 mW/cm<sup>2</sup> (Newport 91160, 300W). The light intensity was calibrated with a standard silicon solar cell. The external quantum efficiencies (EQEs) of the PSCs were measured with a standard test system, including a xenon lamp (Oriel 66902, 300W), a Si detector (Oriel 76175\_71580), a monochromator (Newport 66902) and a dual channel power meter (Newport 2931\_C). The J-V and EQE measurements were performed in ambient air without encapsulation of devices.

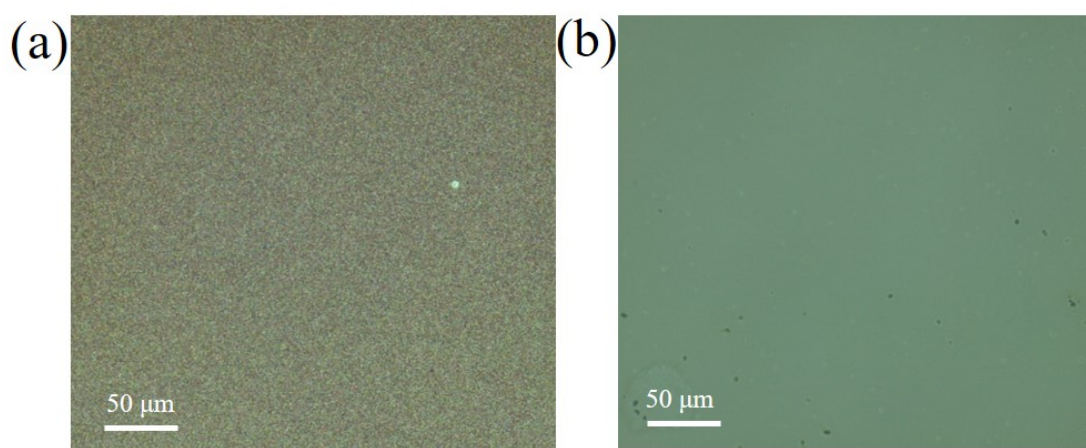

**Figure S1.** Optical microscopy images (a) PbI<sub>2</sub> and (b) 5-SSA/PbI<sub>2</sub> films.

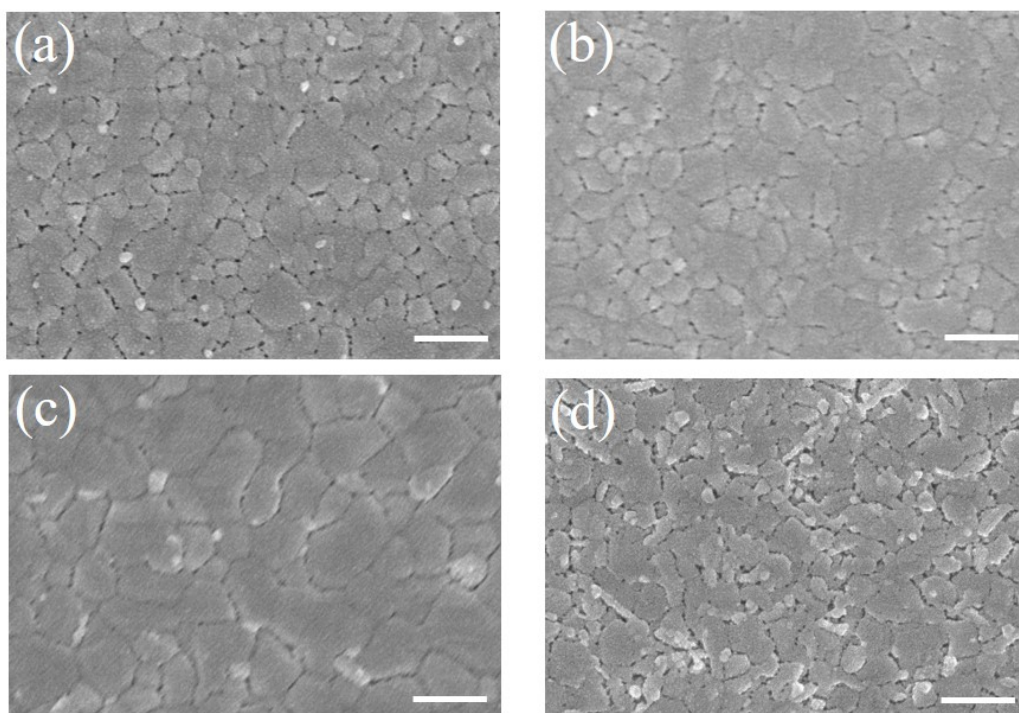

**Figure S2.** Top-view SEM images of MAPbI<sub>3</sub> films with 0 mol% a), 1.0 mol% b), 2.5 mol% c) and 5.0 mol% d) of 5-SSA.

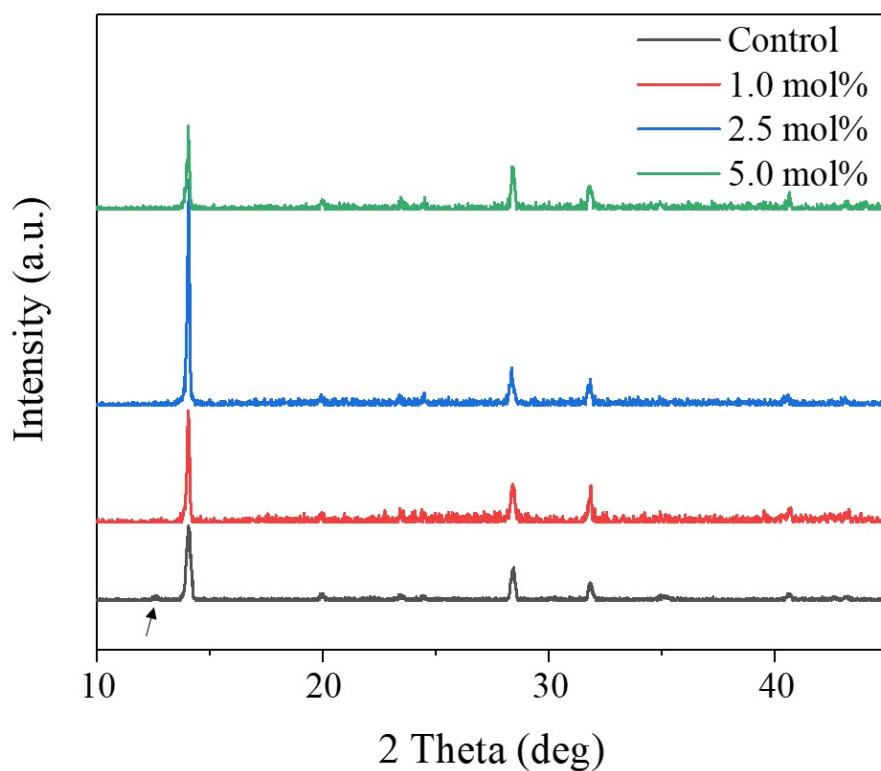

**Figure S3.** XRD patterns of MAPbI<sub>3</sub> films with different amount of 5-SSA.

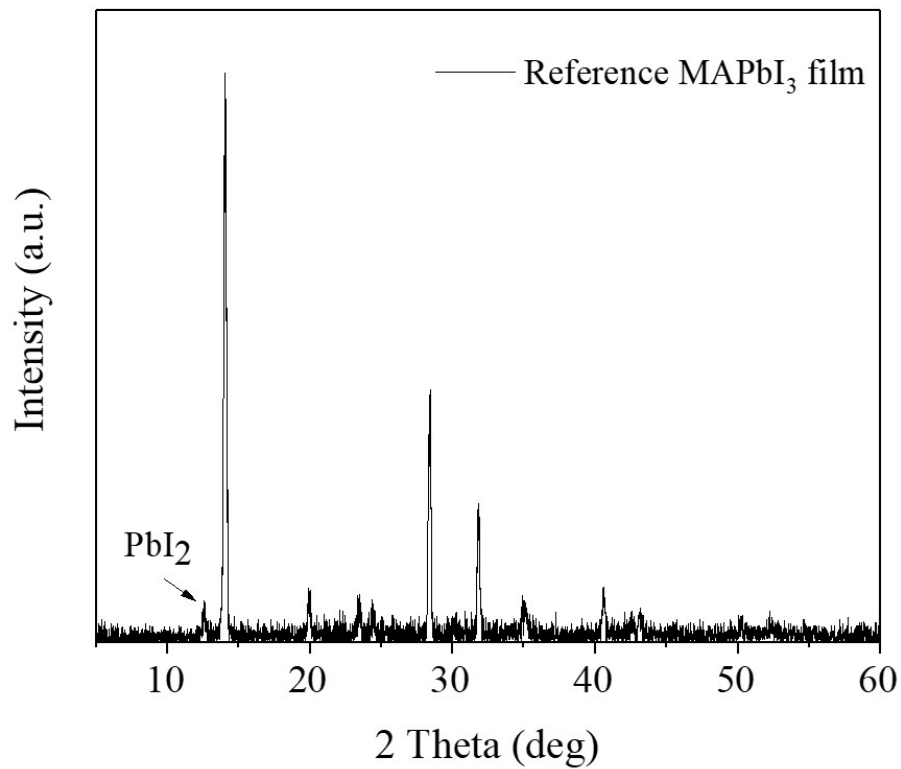

**Figure S4.** XRD pattern of a reference MAPbI<sub>3</sub> film.

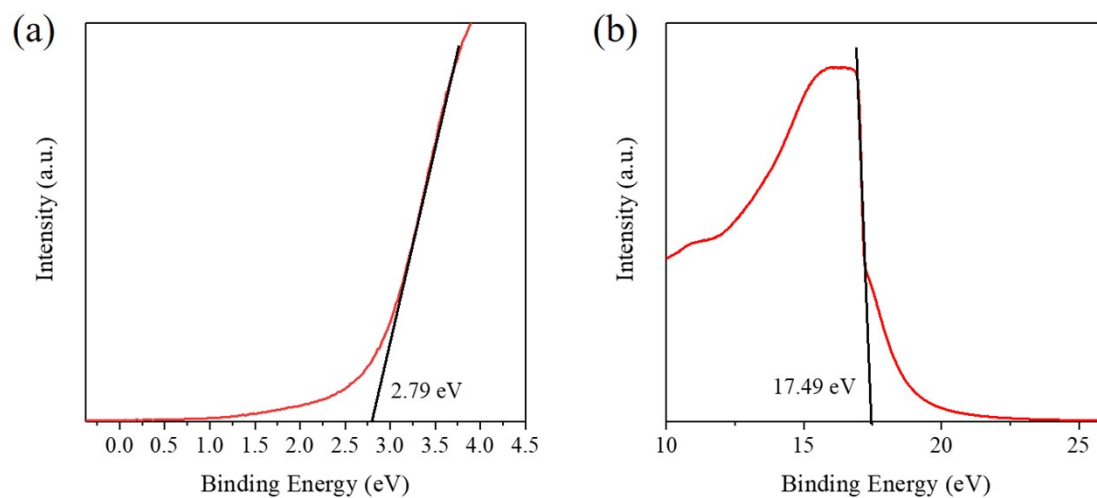

**Figure S5.** a) Near EF region and b) cutoff region of the UPS spectra of 5-SSA/PbI<sub>2</sub> film.

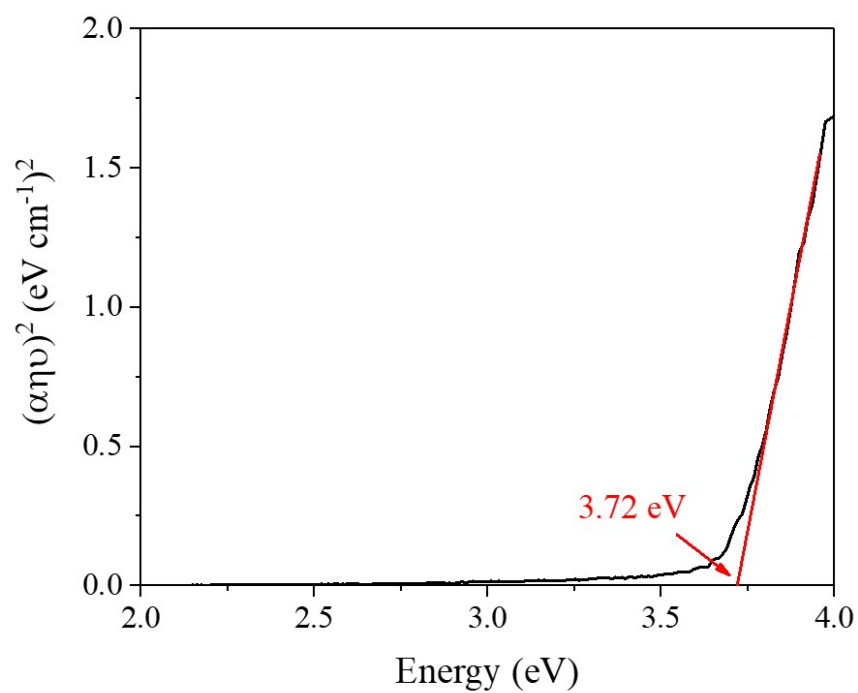

**Figure S6.** The Tauc plot of 5-SSA/PbI<sub>2</sub> film.

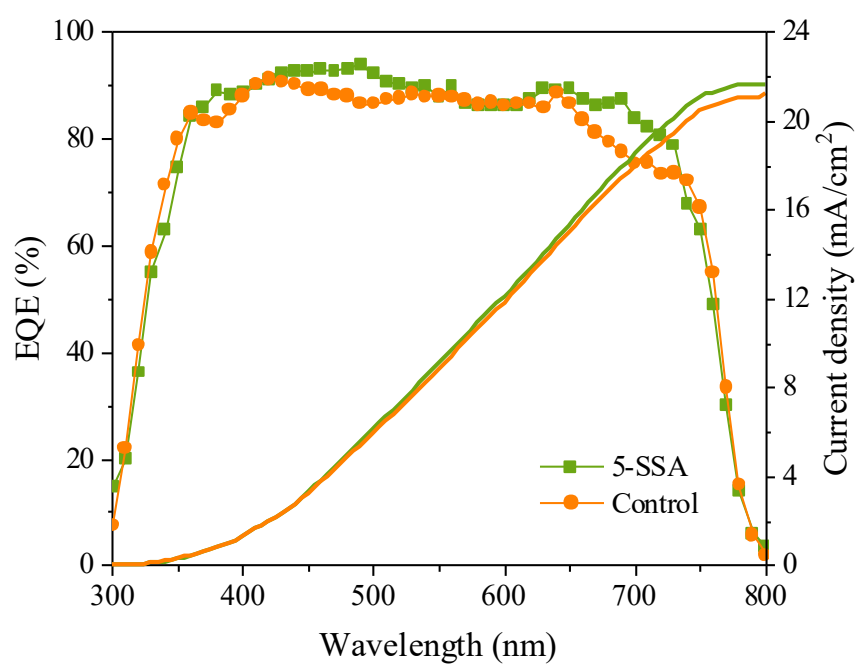

**Figure S7.** The EQE spectra of champion solar cells.

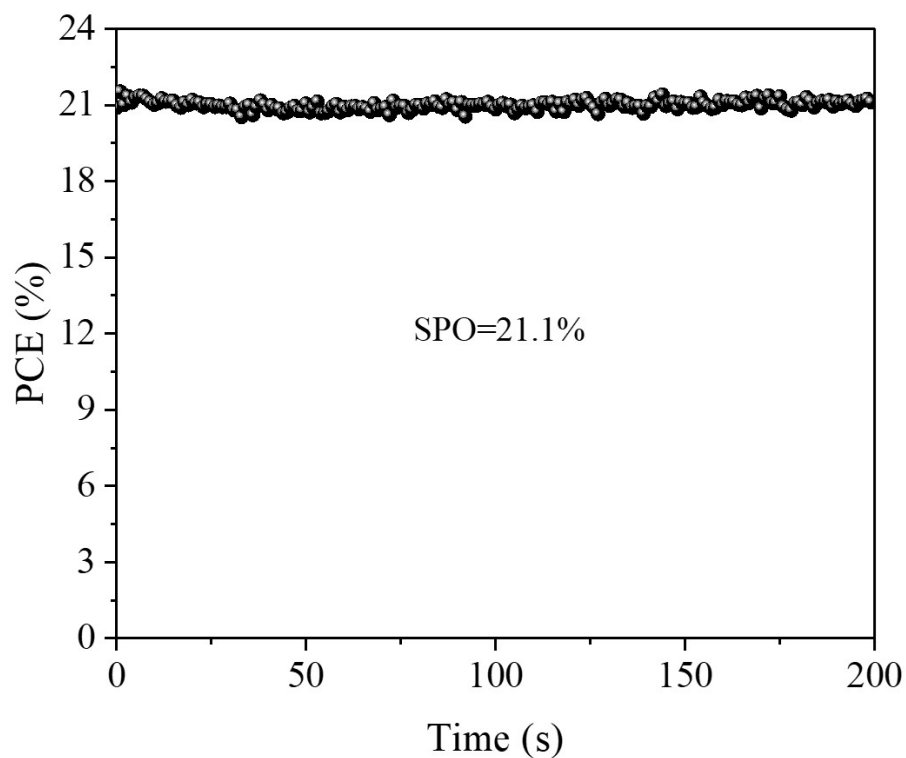

**Figure S8.** The stable power output of a PSC with the 5-SSA/PbI<sub>2</sub> amorphous passivation layer.

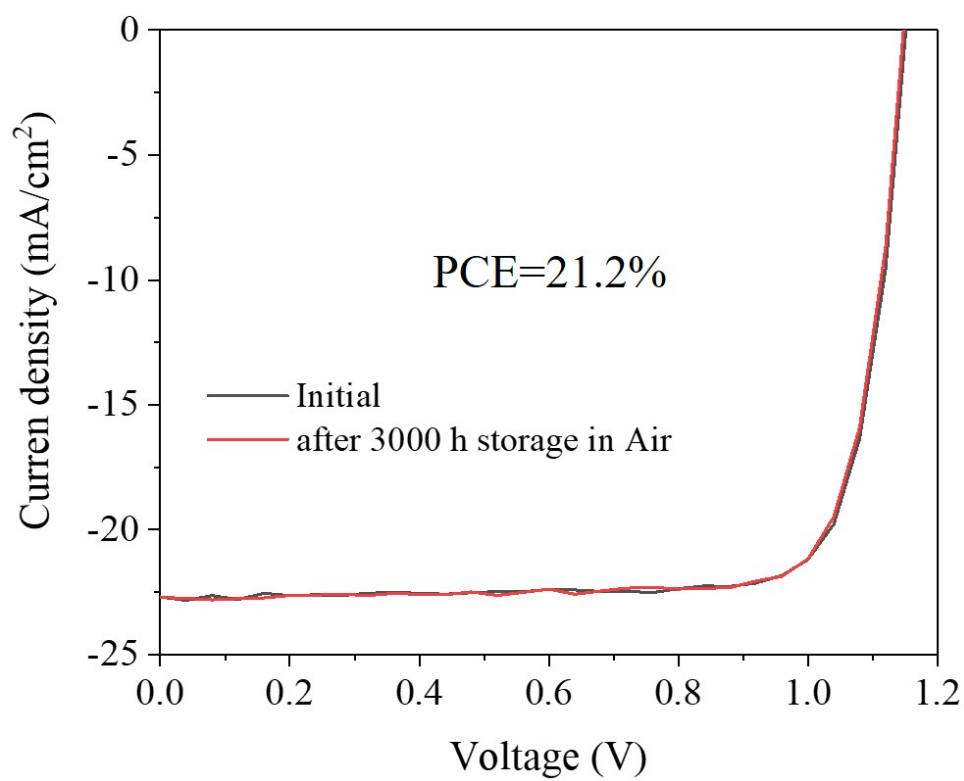

**Figure S9.** The J-V curves of a PSC before and after 3000 hours storage in dark air with 20% humidity.
